# Supplementary material for: Quantitative proteomics approach to investigate the antibacterial response of Helicobacter pylori to daphnetin, a traditional Chinese medicine monomer
Source: Royal Society of Chemistry journal article supplement (doi:10.1039/d0ra06677j), 2021-01-01
Supplement: d0ra06677j1.pdf [file d0ra06677j1.pdf]

**Quantitative proteomics approach to investigate the antibacterial  
response of *Helicobacter pylori* to daphnetin, a traditional Chinese  
medicine monomer.**

Yun Lu, Jing Pang, Genzhu Wang, Xinxin Hu, Xue Li, Guoqing Li, Xiukun Wang, Xinyi Yang,

Congran Li, Xuefu You\*

**Supplementary figures and tables**

Figure S1 Linear correlation curves of replicates from two groups. A) Control group; B) Daphnetin treated group.

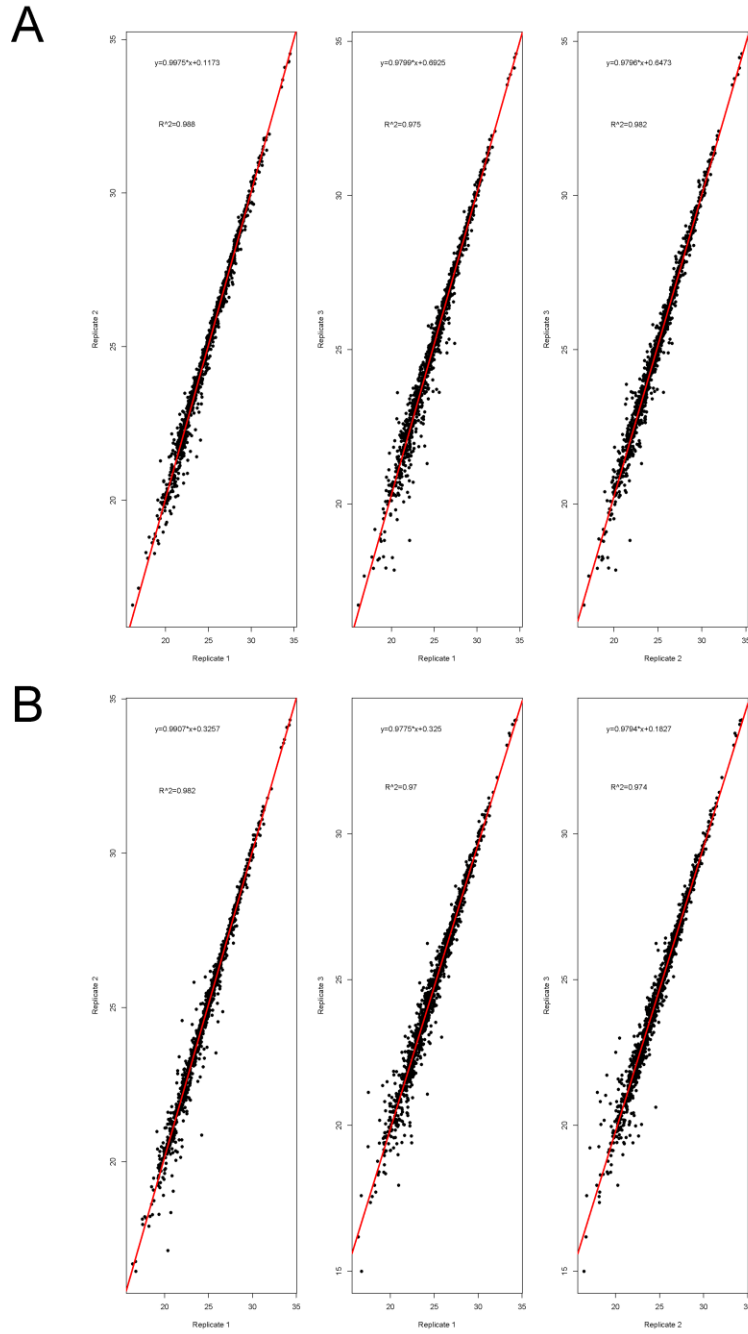

**Figure S2 GO annotation enrichment analysis in biological process(BP), cellular component(CC) and molecular function(MF).**

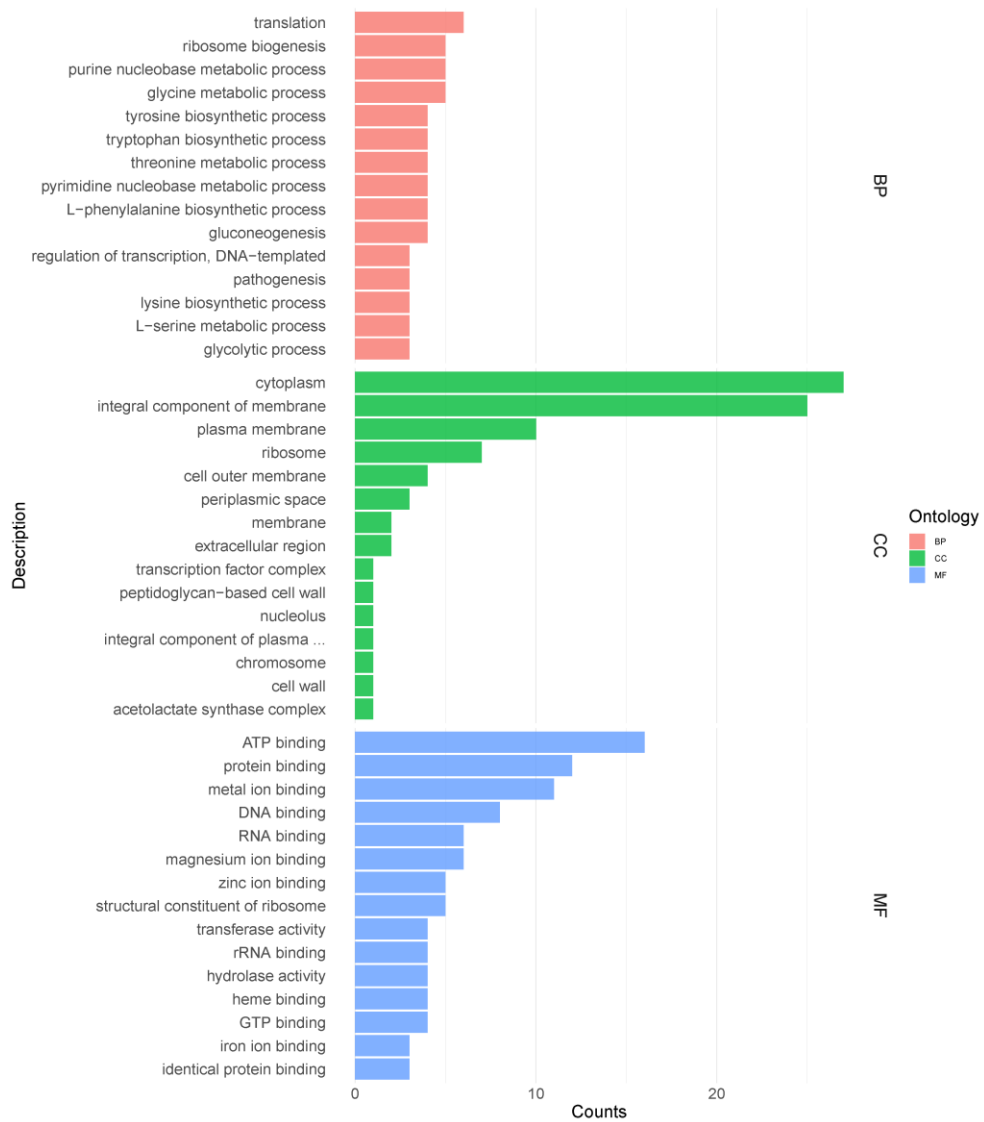

**Figure S3 Dotplot map of the top 20 KEGG pathways sequenced by protein counts derived from the differentially expressed proteins treated with daphnetin.**

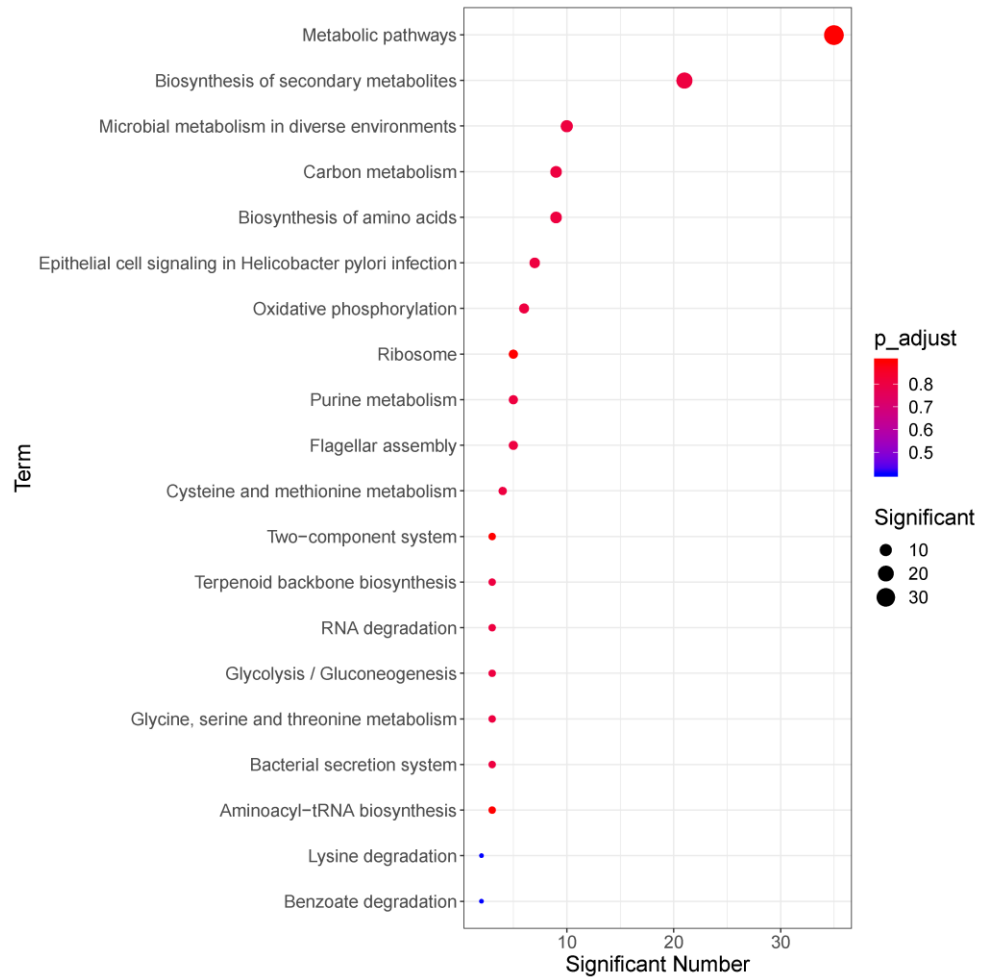

**Table S1 The list of partial significantly differentially expressed proteins under daphnetin pressure (filtered by  $p < 0.05$ , fold change  $> 1.5$ ).**

| Uniprot ID<br>( <i>H. pylori</i><br>ATCC43504) | Gene name                                            | Protein name                                                                                                                                                                                                                                                                                                       | Fold.Chan<br>ge | Uniprot<br>ID of<br>homolog<br>ous<br>protein<br>in H.<br><i>pylori</i><br>ATCC266<br>95 |
|------------------------------------------------|------------------------------------------------------|--------------------------------------------------------------------------------------------------------------------------------------------------------------------------------------------------------------------------------------------------------------------------------------------------------------------|-----------------|------------------------------------------------------------------------------------------|
| <b>Hub proteins in String network</b>          |                                                      |                                                                                                                                                                                                                                                                                                                    |                 |                                                                                          |
| IOZBQ4                                         | purA<br>HP_0255                                      | Adenylosuccinate synthetase (AMPSase)<br>(AdSS) (EC 6.3.4.4) (IMP--aspartate ligase)                                                                                                                                                                                                                               | 0.55            | P56137                                                                                   |
| IOZBS6                                         | HP_0277                                              | Ferredoxin                                                                                                                                                                                                                                                                                                         | 2.89            | O25054                                                                                   |
| IOZBT0                                         | tgt HP_0281                                          | Queueine tRNA-ribosyltransferase (EC 2.4.2.29)<br>(Guanine insertion enzyme) (tRNA-guanine<br>transglycosylase)                                                                                                                                                                                                    | 0.66            | O08314                                                                                   |
| IOZC78                                         | tsf HP_1555                                          | Elongation factor Ts (EF-Ts)                                                                                                                                                                                                                                                                                       | 1.76            | P55975                                                                                   |
| IOZE10                                         | purD<br>HP_1218                                      | Phosphoribosylamine--glycine ligase (EC<br>6.3.4.13) (GARS) (Glycinamide ribonucleotide<br>synthetase) (Phosphoribosylglycinamide<br>synthetase)                                                                                                                                                                   | 2.01            | O25817                                                                                   |
| IOZE23                                         | COG0690<br>Preprotein<br>translocase<br>subunit SecE | Preprotein translocase subunit SecE                                                                                                                                                                                                                                                                                | 1.65            |                                                                                          |
| IOZE29                                         | rpoBC<br>HP_1198                                     | Bifunctional DNA-directed RNA polymerase<br>subunit beta-beta' (EC 2.7.7.6) [Includes:<br>DNA-directed RNA polymerase subunit beta<br>(RNA polymerase subunit beta) (Transcriptase<br>subunit beta); DNA-directed RNA polymerase<br>subunit beta' (RNA polymerase subunit beta')<br>(Transcriptase subunit beta')] | 0.43            | O25806                                                                                   |
| IOZF18                                         | dnaJ HP_1332                                         | Chaperone protein DnaJ                                                                                                                                                                                                                                                                                             | 1.53            | O25890                                                                                   |
| IOZF92                                         | frr HP_1256                                          | Ribosome-recycling factor (RRF)<br>(Ribosome-releasing factor)                                                                                                                                                                                                                                                     | 0.33            | P56398                                                                                   |
| IOZFE3                                         | infA HP_1298                                         | Translation initiation factor IF-1                                                                                                                                                                                                                                                                                 | 1.86            | P65108                                                                                   |
| IOZFH0                                         | rpsR HP_1244                                         | 30S ribosomal protein S18                                                                                                                                                                                                                                                                                          | 0.66            | P66459                                                                                   |
| IOZFP7                                         | folE HP_0928                                         | GTP cyclohydrolase 1 (EC 3.5.4.16) (GTP                                                                                                                                                                                                                                                                            | 1.58            | P56462                                                                                   |

|        |                     |                                                                                                                                                                             |      |        |
|--------|---------------------|-----------------------------------------------------------------------------------------------------------------------------------------------------------------------------|------|--------|
|        |                     | cyclohydrolase I) (GTP-CH-I)                                                                                                                                                |      |        |
| IOZFS0 | recR HP_0925        | Recombination protein RecR                                                                                                                                                  | 1.53 | P56214 |
| IOZFS2 | htpX HP_0927        | Protease HtpX homolog (EC 3.4.24.-)                                                                                                                                         | 0.33 | O25582 |
| IOZFT3 | dnaK<br>HP_0109     | Chaperone protein DnaK (HSP70) (Heat shock<br>70 kDa protein) (Heat shock protein 70)                                                                                       | 4.85 | P55994 |
| IOZGR5 | tyrS HP_0774        | Tyrosine--tRNA ligase (EC 6.1.1.1)<br>(Tyrosyl-tRNA synthetase) (TyrRS)                                                                                                     | 2.22 | P56417 |
| IOZGT4 | rpsT HP_0076        | 30S ribosomal protein S20                                                                                                                                                   | 0.19 | P56027 |
| IOZHC3 | dnaN<br>HP_0500     | Beta sliding clamp (Beta clamp) (Sliding clamp)<br>(Beta-clamp processivity factor) (DNA<br>polymerase III beta sliding clamp subunit)<br>(DNA polymerase III subunit beta) | 2.98 | O25242 |
| IOZHE1 | pheT<br>HP_0402     | Phenylalanine--tRNA ligase beta subunit (EC<br>6.1.1.20) (Phenylalanyl-tRNA synthetase beta<br>subunit) (PheRS)                                                             | 0.29 | P56145 |
| IOZI68 | rpmF<br>HP_0200     | 50S ribosomal protein L32                                                                                                                                                   | 0.22 | P56054 |
| IOZIK8 | gyrA HP_0701        | DNA gyrase subunit A (EC 5.6.2.2)                                                                                                                                           | 0.10 | P48370 |
| IOZI88 | HP_0221             | Nitrogen fixation protein NifU                                                                                                                                              | 0.12 | O25009 |
| IOZEZ6 | hugZ<br>HP_0318     | Heme oxygenase HugZ (EC 1.14.99.-)                                                                                                                                          | 3.21 | O25087 |
| IOZEP5 | queA<br>HP_1062     | S-adenosylmethionine:tRNA<br>ribosyltransferase-isomerase (EC 2.4.99.17)<br>(Queuosine biosynthesis protein QueA)                                                           | 0.49 | O25702 |
| IOZDP0 | HP_1182             | ATP_bind_3 domain-containing protein                                                                                                                                        | 0.58 | O25794 |
| IOZE14 | pnp HP_1213         | Polyribonucleotide nucleotidyltransferase (EC<br>2.7.7.8) (Polynucleotide phosphorylase)<br>(PNPase)                                                                        | 0.24 | O25812 |
| IOZF96 | HP_1269             | NADH-quinone oxidoreductase subunit J (EC<br>7.1.1.-)                                                                                                                       | 0.35 | O25859 |
| IOZGU4 | rpoD<br>HP_0088     | RNA polymerase sigma factor RpoD<br>(Sigma-70)                                                                                                                              | 1.60 | P55993 |
| IOZE21 | tuf tufA<br>HP_1205 | Elongation factor Tu (EF-Tu)                                                                                                                                                | 0.02 | P56003 |
| IOZB68 | rpsU HP_0562        | 30S ribosomal protein S21                                                                                                                                                   | 0.63 | P56028 |
| IOZBZ4 | icd HP_0027         | Isocitrate dehydrogenase [NADP] (IDH) (EC<br>1.1.1.42) (IDP) (NADP(+)-specific ICDH)<br>(Oxalosuccinate decarboxylase)                                                      | 0.62 | P56063 |
| IOZHT4 | pgk HP_1345         | Phosphoglycerate kinase (EC 2.7.2.3)                                                                                                                                        | 0.67 | P56154 |
| IOZJ77 | rpmE<br>HP_0551     | 50S ribosomal protein L31                                                                                                                                                   | 2.14 | P66185 |

| <b>Cytochrome c oxidase related proteins</b> |              |                                                                                                                                                              |      |        |
|----------------------------------------------|--------------|--------------------------------------------------------------------------------------------------------------------------------------------------------------|------|--------|
| IOZEA8                                       | HP_0144      | Cytochrome c oxidase, heme b and copper-binding subunit, membrane-bound (FixN)                                                                               | 0.66 | O24955 |
| IOZEA9                                       | HP_0145      | Cytochrome c oxidase, monoheme subunit, membrane-bound (FixO)                                                                                                | 0.65 | O24956 |
| <b>Flagellar related proteins</b>            |              |                                                                                                                                                              |      |        |
| IOZB47                                       | HP_0584      | Flagellar switch protein (FlIN)                                                                                                                              | 2.30 | O25306 |
| IOZEU3                                       | HP_0353      | Flagellar export protein (FlIH)                                                                                                                              | 1.63 | O25120 |
| IOZH55                                       | fliI HP_1420 | Flagellum-specific ATP synthase (EC 7.1.2.2)                                                                                                                 | 1.61 | O07025 |
| IOZE88                                       | HP_0907      | Basal-body rod modification protein FlgD                                                                                                                     | 2.02 | O25565 |
| IOZD59                                       | HP_1119      | Flagellar hook-associated protein 1 (HAP1) (FlgK)                                                                                                            | 1.83 | O25744 |
| <b>Infection related proteins</b>            |              |                                                                                                                                                              |      |        |
| IOZBK7                                       | HP_0289      | Toxin-like outer membrane protein                                                                                                                            | 0.59 | O25063 |
| IOZBT4                                       | HP_0286      | Cell division protein (FtsH)                                                                                                                                 | 2.74 | O25060 |
| IOZDE4                                       | coaX coaA    | Type III pantothenate kinase (EC 2.7.1.33) (PanK-III) (Pantothenic acid kinase)                                                                              | 0.45 | O25533 |
|                                              | HP_0862      |                                                                                                                                                              |      |        |
| IOZH94                                       | HP_0520      | Cag pathogenicity island protein (Cag1)                                                                                                                      | 0.38 | O25257 |
| IOZIG1                                       | HP_0371      | Biotin carboxyl carrier protein of acetyl-CoA carboxylase                                                                                                    | 2.01 | O25135 |
| IOZJ86                                       | HP_0543      | Cag pathogenicity island protein (Cag22)                                                                                                                     | 0.52 | O25276 |
| IOZFR9                                       | HP_0924      | Probable tautomerase HP_0924 (EC 5.3.2.-)                                                                                                                    | 1.56 | O25581 |
| IOZHH0                                       | hpaA         | Neuraminylactose-binding hemagglutinin (Flagellar sheath adhesin) (N-acetylneuraminylactose-binding fibrillar hemagglutinin receptor-binding subunit) (NLBH) | 1.73 | P55969 |
|                                              | HP_0797      |                                                                                                                                                              |      |        |
| IOZBG0                                       | HP_0638      | Outer membrane protein (OpiA)                                                                                                                                | 0.42 | O25355 |
| IOZG47                                       | HP_0807      | Iron(III) dicitrate transport protein (FecA)                                                                                                                 | 0.53 | O25487 |
| IOZGF7                                       | psel HP_0178 | Pseudaminic acid synthase (EC 2.5.1.97) (Pseudaminic acid biosynthesis protein I)                                                                            | 0.37 | O24980 |

---

**Table S2 The list of target proteins and corresponding peptides of daphnetin-treated *H. pylori*. Fifteen target proteins were identified with peptide sequences and product ions quantified by label-free PRM analysis.**

| Protein Accession | Gene Name       | Peptide Sequence    | Precursor Charge | Product Ions         | Adjusted p.value | Fold change |
|-------------------|-----------------|---------------------|------------------|----------------------|------------------|-------------|
| IOZBG0            | HP17_05385      | DAQNALNAVK          | 2                | y7,y6,y5,y4,y3       | 0.011            | 0.20        |
|                   |                 | GLSIFYK             | 2                | b3,y5,y4,y3,y2       | 0.011            | 0.11        |
| IOZBK7            | HP17_05155      | DNATNLLLELASYTQQTSR | 2                | b2,y12,y11,y10,y9,y8 | 0.018            | 0.35        |
|                   |                 | FVGENTLLYR          | 2                | b2,y9,y8,y7,y6,y1    | 0.010            | 0.36        |
|                   |                 | DYDFVVR             | 2                | b2,y5,y4,y3,y2,y1    | 0.013            | 0.29        |
| IOZBQ4            | purA HP17_04970 | NISSAVVSVK          | 2                | b2,b3,y10,y9,y8,y3   | 0.011            | 0.32        |
|                   |                 | AHVILPYHAK          | 3                | b2,b3,b4,y5,y4,y3    | 0.010            | 0.33        |
| IOZE29            | HP17_02863      | SIFPIQDEHNR         | 3                | b2,y7,y6,y5,y4,y3    | 0.035            | 0.60        |
|                   |                 | YDILNEEQQNISR       | 3                | b3,y7,y6,y5,y4,y2    | 0.037            | 0.54        |
| IOZFT3            | dnaK HP17_00905 | EAGTIAGLNVLRL       | 2                | y10,y8,y7,y6,y4,y1   | 0.035            | 2.04        |
|                   |                 | NHADSLAHQTQK        | 3                | b2,b3,b5,y5,y4,y3    | 0.041            | 2.78        |
|                   |                 | FGIVYQNYFGDPDR      | 3                | b3,y10,y9,y8,y3,y1   | 0.011            | 0.33        |
| IOZG47            | HP17_08711      | FVVNAFEPK           | 3                | b2,y7,y6,y5,y4,y2    | 0.010            | 0.30        |
|                   |                 | SQGVELELYYTPIR      | 3                | b2,b3,y10,y9,y8,y7   | 0.014            | 0.44        |
| IOZHH0            | HP17_07264      | SLFLQLSSFLELRL      | 2                | b3,y8,y7,y6,y1       | 0.037            | 0.33        |
|                   |                 | SEDIHSFGIDVSK       | 3                | b2,b3,y9,y8,y7,y2    | 0.020            | 0.34        |
| IOZIK8            | HP17_06437      | FTLSEIQSK           | 2                | b2,b3,b6,y8,y7,y4    | 0.029            | 0.41        |
|                   |                 | AIVNLISLAPDEK       | 2                | b2,y8,y7,y5,y4,y2    | 0.016            | 0.22        |
| IOZJ86            | HP17_05920      | EINDGQDPQK          | 2                | b2,y8,y7,y6,y4,y3    | 0.024            | 0.24        |
|                   |                 | YFQNIDEVTNK         | 2                | y8,y7,y6,y4,y3,y2    | 0.030            | 0.36        |
| IOZGF7            | HP17_08384      | ASTPLEWHAELFELAR    | 3                | y9,y8,y7,y6,y5,y1    | 0.026            | 0.34        |
|                   |                 | SLFVIK              | 2                | b2,b3,y5,y4,y3,y2    | 0.018            | 0.28        |
|                   |                 | TTLSSAAISAVLSLK     | 3                | b6,y7,y6,y5,y4,y3    | 0.025            | 0.23        |
| IOZE21            | tuf HP17_02823  | QVGVPHIVVFLNK       | 3                | y7,y6,y5,y4,y3,y2    | 0.041            | 0.63        |
|                   |                 | FEGEIVVLSK          | 2                | b2,y8,y5,y4,y3,y2    | 0.020            | 0.41        |
